# Supplementary material for: Interfering with retrotransposition by two types of CRISPR effectors: Cas12a and Cas13a
Source: PubMed Central journal article supplement (PMC7235257; doi:10.1038/s41421-020-0164-0), 2020-05-19
Supplement: 41421_2020_164_MOESM1_ESM.pdf [file 41421_2020_164_MOESM1_ESM.pdf]

## **Supplementary Information for**

**Interfering with retrotransposition by two types of CRISPR effectors:**

**Cas12a and Cas13a**

Niubing Zhang<sup>1,3,#</sup>, Xinyun Jing<sup>1,#</sup>, Yuanhua Liu<sup>2</sup>, Minjie Chen<sup>1,3</sup>, Xianfeng Zhu<sup>3</sup>,

Jing Jiang<sup>3</sup>, Hongbing Wang<sup>4</sup>, Xuan Li<sup>1,\*</sup>, and Pei Hao<sup>2,\*</sup>

## **CONTENTS:**

Supplementary Figures,

Supplementary Tables,

Supplementary Data S1,

Supplementary Data S2.

## SUPPLEMENTARY FIGURES

Figure S1

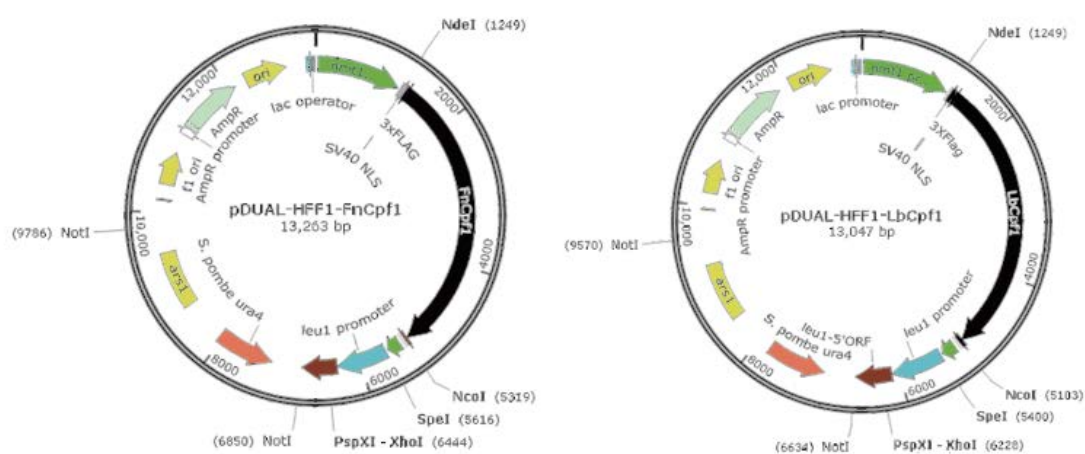

**Figure S1. Maps of plasmids of pDUAL-HFF1-FnCpf1 and pDUAL-HFF1-LbCpf1 for chromosome-integrated expression of FnCpf1 and LbCpf1 in *S. pombe*.** The FnCpf1 and LbCpf1 expression cassettes contain the *nmt1* promoter and the *ADH1* terminator. The SV40-derived nuclear localization signal (NLS) was fused to both N and C termini of Cpf1; a 3 × Flag was in-frame fused to the N terminus of NLS.

**Figure S2**

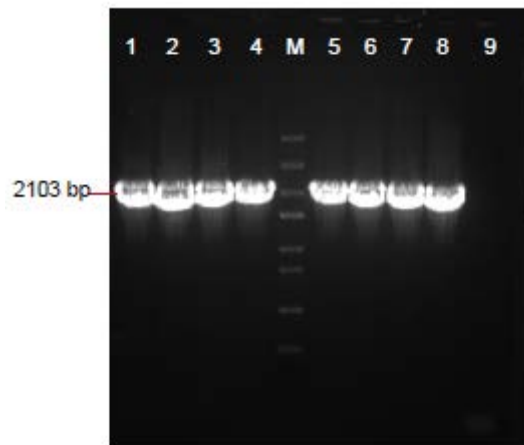

**Figure S2. Diagnostic PCR for *S. pombe* transformants with FnCpf1 and LbCpf1 expression cassettes integrated into the chromosome.** Primer set ADHterm-F/leu1-R (Supplementary Data 1) was used for diagnostic PCR. Lanes 1-4: *S. pombe* transformants with integrated expression construct of FnCpf1; Lanes 5-8: *S. pombe* transformants with integrated expression construct of LbCpf1; Lane 9: control wild-type *S. pombe* strain (without integrated expression constructs); M: *Trans5K* DNA Marker (Trans Transgen Biotech, Shanghai, China).

**Figure S3**

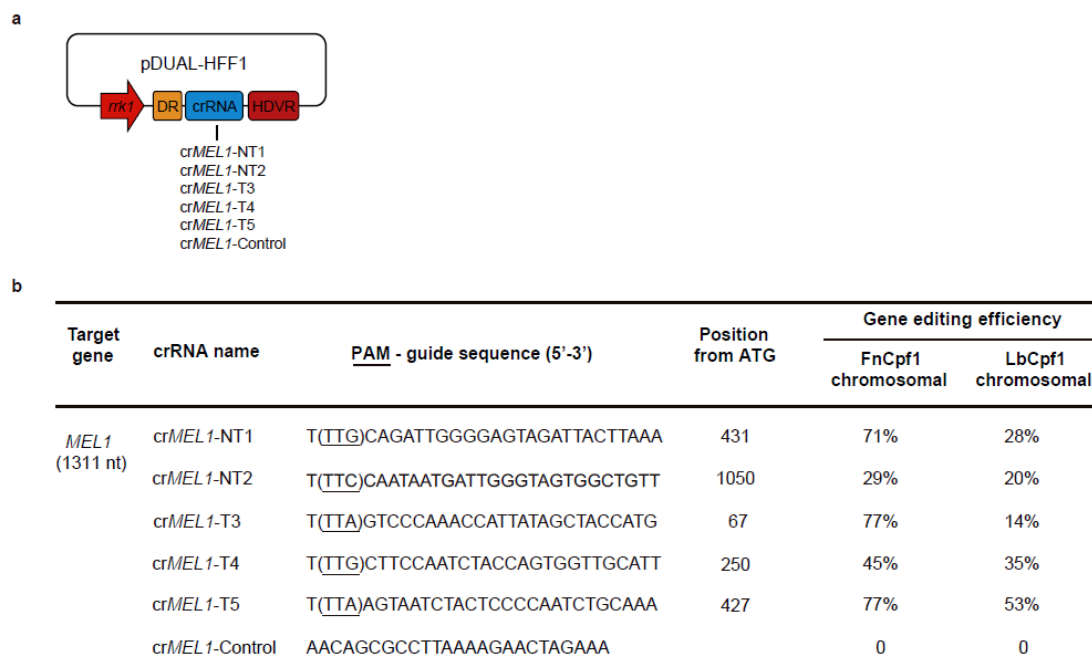

**Figure S3. Editing on *MEL1* gene by chromosomal expressing FnCpf1 and LbCpf1 with different crRNAs.** (a) Schematic representation the crRNA expression cassette for FnCpf1 and LbCpf1. *rrk1*, *rrk1* promoter; DR, direct repeat of crRNA; HDVR, hepatitis delta virus ribozyme. (b) Targeting sequences and editing efficiency on *MEL1* gene by chromosomal expressing FnCpf1 or LbCpf1 with five different crRNAs in *S.pombe*. The PAM motif (TTN for FnCpf1 and LbCpf1) regions are underlined.

**Figure S4**

**a**

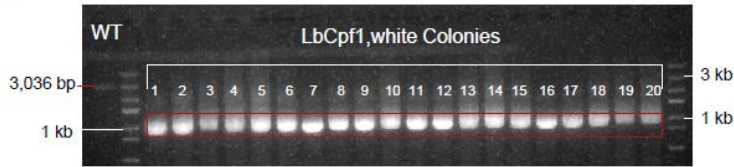

**b**

**crMEL1-T5\_Col1:**

TTCTTATACGGAATACATACAATTATATGCACTGAAAAGTTTTGCCACATTCGCCTCCGTAGTACTTCAAATGCCAATAGTAA  
 TTACATTTTACAAGTTGAAAAACAAAAATGGCTGTAGTACTTGTACTCATTAAAGCTTCAAGTTACAATTTTTAGAAATC  
 AGATCAGGCAGACTGCTGGCAAAGGGCAAACAACTAATGCCTATTATATCATCTGACGCACTGGAGCTGTACCACGTTGGTT  
 AGCTTCCATTTTATTGAATACTGAGAATTGCAACAATCTCTTATATTTATAATGCTCGATGTCTGTTAACGAAAAATAAAGT  
 ATTTAAATGGATTGAGTAAAAATGAACCGTAAAGATTTGTAATGTATTACCGTAGCACATGAGTTAAATAATCCGCATTCAA  
 TATGTCCTTGTAATAATCTTATTAAGTAACCGTAACGTTTTATCATTATGTAAGCGATATTGACTTCTTGTTCC  
 CCAGAATCGACCTAGCACATGATATTTTTTTTCGAATAAATTCGAATATAAAAAAAATTTTACGTATGTAACATAATTTGAATG  
 CTCTTACCAAAAACCCCGATACAGATCATAATGCCTTTTTTATTTTTTAAACATTTTTGCGCCTTCCGGTTATTGTCAAATT  
 CGAAAAATTTTTTAAAAAAGTTTATTATTTTTTTCTGTACATCAAATATTCAACGCTAAGAAAACCATAGAAAAATGCG  
 CATCAAATTTTAATTAAGATATAGCAGATGCTATAACAAAAGGATTTGTCTAAAACCTAGAGATATTATTAAGCTTTTCTAA  
 TTGCACGCCAGTTTATATATCATTTAATGATTTTCATTTCTGCTAGAAATAGTTATATT

**crMEL1-T5\_Col2:**

TTCTTATACGGAATACATACAATTATATGCACTGAAAAGTTTTGCCACATTCGCCTCCGTAGTACTTCAAATGCCAATAGTAA  
 TTACATTTTACAAGTTGAAAAACAAAAATGGCTGTAGTACTTGTACTCATTAAAGCTTCAAGTTACAATTTTTAGAAATC  
 AGATCAGGCAGACTGCTGGCAAAGGGCAAACAACTAATGCCTATTATATCATCTGACGCACTGGAGCTGTACCACGTTGGTT  
 AGCTTCCATTTTATTGAATACTGAGAATTGCAACAATCTCTTATATTTATAATGCTCGATGTCTGTTAACGAAAAATAAAGT  
 ATTTAAATGGATTGAGTAAAAATGAACCGTAAAGATTTGTAATGTATTACCGTAGCACATGAGTTAAATAATCCGCATTCAA  
 TATGTCCTTGTAATAATCTTATTAAGTAACCGTAACGTTTTATCATTATGTAAGCGATATTGACTTCTTGTTCC  
 CCAGAATCGACCTAGCACATGATATTTTTTTTCGAATAAATTCGAATATAAAAAAAATTTTACGTATGTAACATAATTTGAATG  
 CTCTTACCAAAAACCCCGATACAGATCATAATGCCTTTTTTATTTTTTAAACATTTTTGCGCCTTCCGGTTATTGTCAAATT  
 CGAAAAATTTTTTAAAAAAGTTTATTATTTTTTTCTGTACATCAAATATTCAACGCTAAGAAAACCATAGAAAAATGCG  
 CATCAAATTTTAATTAAGATATAGCAGATGCTATAACAAAAGGATTTGTCTAAAACCTAGAGATATTATTAAGCTTTTCTAA  
 ATTGCACGCCAGTTT

**c**

AGGTAAAACCTCCAGAACACTTAATCAAATAATGCTGTGGTCGAGAAATCTTATACGGAATACATACAATTATATGCACT  
 GAAAAGTTTTGCCACATTCGCCTCCGTAGTACTTCAAATGCCAATAGTAATTACATTTTACAAGTTGAAAAACAAAAATGGCT  
 GTAGTACTTGTACTCATTAAAGCTTCAAGTTACAATTTTTAGAAATCAGATCAGGCAGACTGCTGGCAAAGGGCAAACAACTAA  
 TGCTATTATATCATCTGACGCACTGGAGCTGTACCACGTTGGTTAGCTTCCATTTTATTGAATACTGAGAATTGCAACAATCT  
 CTTATATTTATAATGCTCGATGTCTGTTAACGAAAAATAAAGTATTTAAATGGATTGAGTAAAAATGAACCGTAAAGATTTGTAAT  
 GTATTACCGTAGCACATGAGTTAAATAATCCGCATTCCAATATGCTTGTAAAAATCTTATTAAGTAACCGTAACGTTTATCATT  
 TGTAAGCGATATTGACTTCTTGTTCCAGAATCGACCTAGCACATGATATTTTTTTTCGAATAAATTCGAATATAAAAAAAATTTTA

```
CGTATGTAACATAATTTGAATGCTCTTACCAAAAACCCCGATACAGATCATAATGCCTTTTTTTATTTTTTAAACATTTTTGCGCCT
TTCCGGTTATTGTCAAAATTCGAAAAATTTTTTAAAAAAGTTTATTATTATTTTTTCTGTACATCAAATATTCAACGCTAAGAA
AACCATAGAAAAATGCGCATCAAATTTAATTAAGATATAGCAGATGCTATAACAAAAGGATTTGTCTAAACCTAGAGATATTA
TTAAAGCTTTTTCTAATTGCACGCCAGTTTTATATATCATTAATGATTTTCATTTTTCTGTCTAGTAAATAGTTATATTTGATTGATA
ACTAACAAATTTTATAAATTCGGGGCTCGTTCTACTATAGC
```

**Figure S4. Diagnostic PCR products and sequencing of *mel1* mutants generated by LbCpf1 editing.** (a) Diagnostic PCR products of white colonies of *mel1* mutants generated by LbCpf1. All colonies show a 998-bp band indicating deletion of *MEL1* from LbCpf1 editing. The wild type strain shows a 3036-bp band. The primer set used for PCR were described in Figure 1c. (b) Sequences of PCR products from two randomly selected *mel1* mutant colonies. The sequence results show the correct deletion of the center portion of *MEL1* sequence. The blue and yellow highlighted sequences represent the upstream and downstream regions of *MEL1* gene, whereas the central portion is deleted. (c) Sequence of the template which was used for editing of *MEL1* gene by FnCpf1 or LbCpf1 through homologous recombination (HR). Blue sequence, the left arm of the HR template, which was amplified using primers of MEL1-P5, mel1-left-p3-new from *S.pombe* genomic DNA. Yellow sequence, the right arm of the HR template, which was amplified using primers MEL1-P3 and mel1-right-P5-new from *S.pombe* genomic DNA. The HR template was obtained by over-lap PCR using primers MEL1-P5, MEL1-P3 from left and right arms.

**Figure S5**

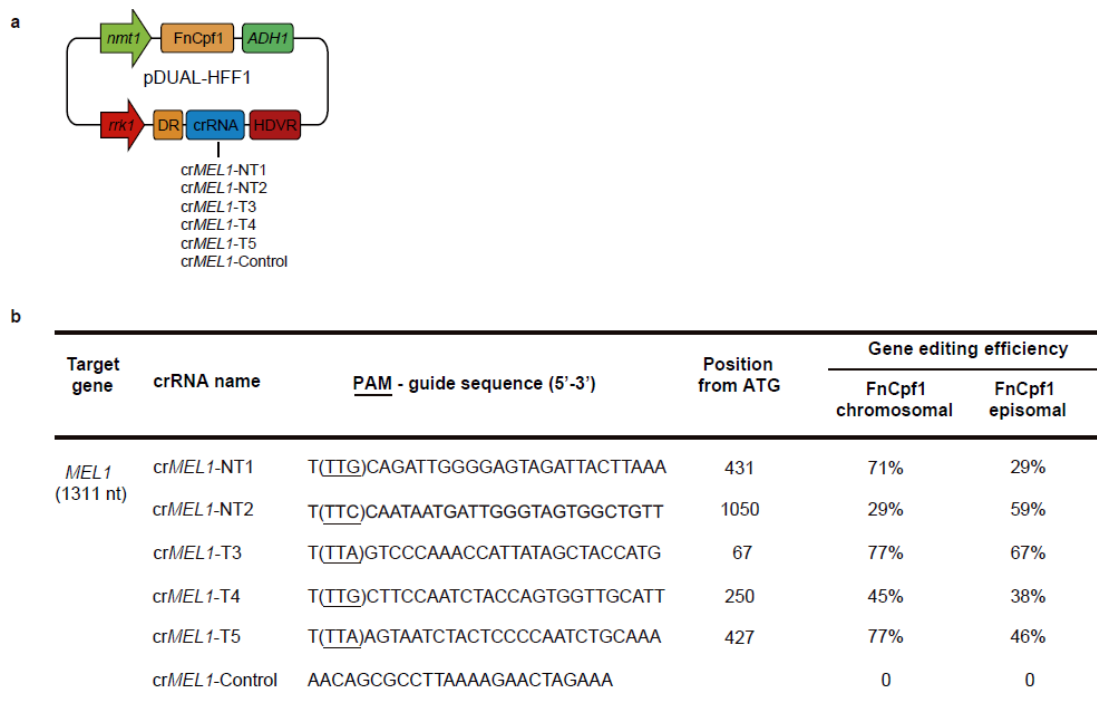

**Figure S5. Editing efficiency on *MEL1* gene by chromosomal-expressing FnCpf1 and episomal-expressing FnCpf1 with five different crRNAs.** (a) Schematic representation of the FnCpf1 and crRNA expression cassette in multi-copy plasmid pDUAL-HFF1. *rrk1*, *rrk1* promoter; DR, direct repeat of crRNA; HDVR, hepatitis delta virus ribozyme. (b) Targeting sequences and editing efficiency on *MEL1* gene by chromosomal-expressing FnCpf1 and episomal-expressing FnCpf1 with five different crRNAs in *S.pombe*. The PAM motif (TTTN for FnCpf1) regions are underlined.



**Figure S6**

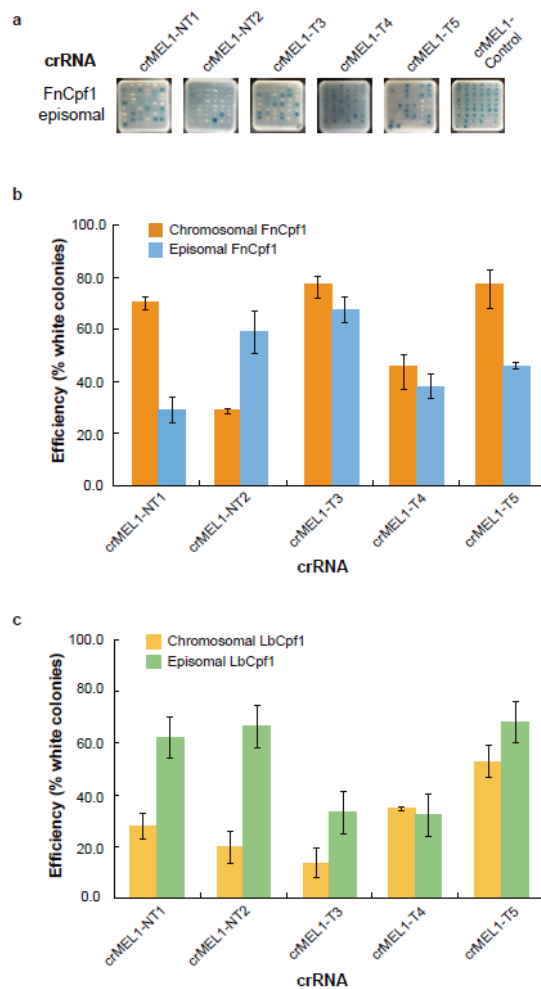

**Figure S6. Editing of *MEL1* gene by chromosomal-expressing FnCpf1 and episomal-expressing FnCpf1 with five different crRNAs.** (a) The editing on *MEL1* gene by episomal-expressing FnCpf1 with five different crRNAs, estimated by formation of white- (*mell* mutant) and blue-colored (*MEL1* wildtype) colonies, assayed on agar plates containing the X- $\alpha$ -Gal. (b) Efficiency of genome editing on *MEL1* gene by chromosomal expressing FnCpf1 and episomal expressing FnCpf1 with five different crRNAs. Bar represents means  $\pm$  s.e.m. with n = 3. (c) Efficiency of genome editing on *MEL1* gene by chromosomal expressing LbCpf1 and episomal expressing LbCpf1 with five different crRNAs. Bar represents means  $\pm$  s.e.m. with n = 3.

**Figure S7**

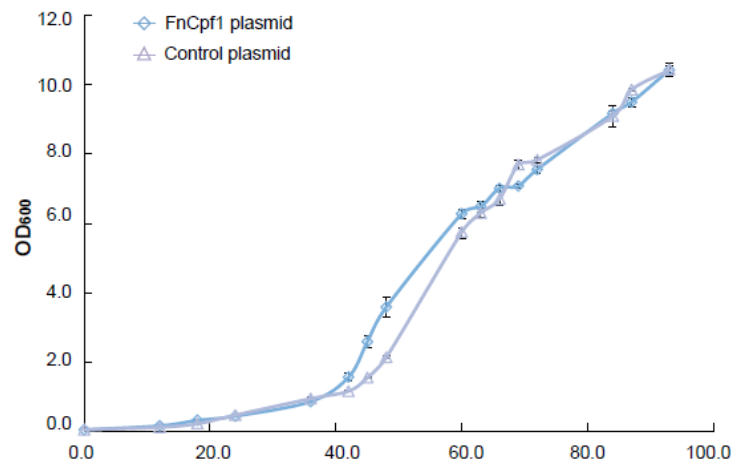

**Figure S7. Growth in liquid culture media (EMM + uracil) of *S. pombe* strains with episomal expressing FnCpf1 compared to the control strain with control plasmid pDUAL-HFF1. They had an average double time of 9.2 h and 9.6 h, respectively. Data are means  $\pm$  s.e.m. (n = 4 independent experiments)**

**Figure S8**

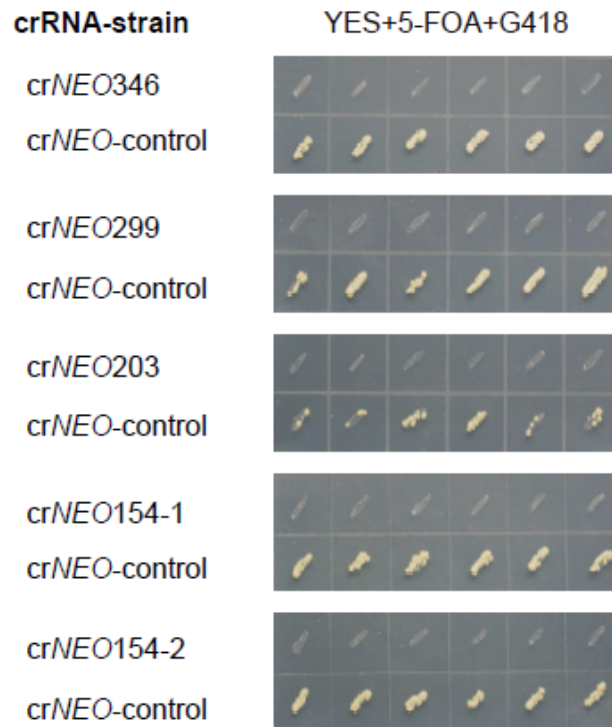

**Figure S8. Prolonged crRNA targeting eliminating residual Tf1 retrotransposition by Cas12a.**

‘Transfer-and-patch’ assay for detection of Tf1 retrotransposition using plates containing YES media with 5-FOA and G418. The effects of persistent crRNA targeting in their genome-integrated strains were compared to crNEO-control strains side by side.

**Figure S9**

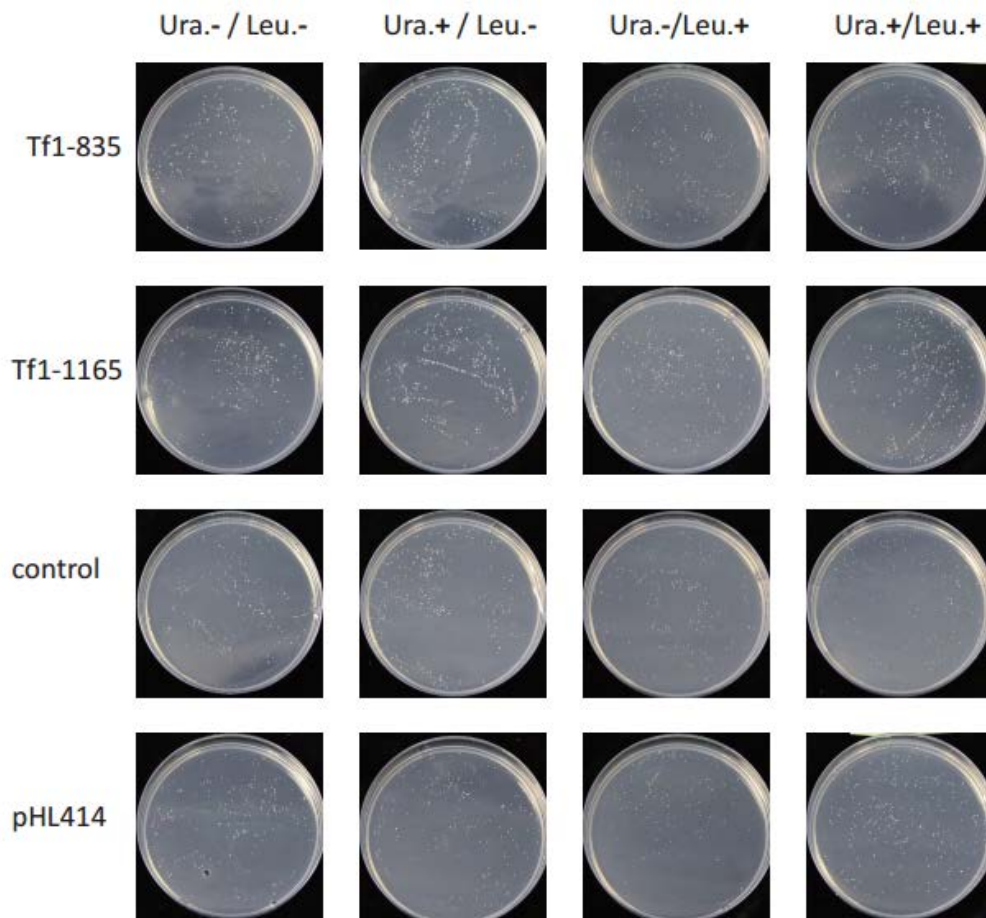

**Figure S9. The ending *S. pombe* populations from one batch of liquid cultures (Fig. 5c) were further checked for presence of selection markers for Cas13a gene (Leu+) and Tf1/crRNA-carrying plasmid (Ura+)**

100  $\mu$ L of 1000-fold diluted cells at late log-phase cultures (Fig. 5c) were plated to four different EMM selective plates (uracil-/leucine-, uracil+/leucine-, uracil-/leucine+, and uracil+/leucine+) respectively. The presence of Cas13a gene and Tf1/crRNA-carrying plasmid were validated by colony-formation on selective media plates.

## SUPPLEMENTARY TABLES

**Supplementary Table S1.** List of strains and plasmids used in this study.

| Strains and plasmids              | Characteristics                                                                                                                                                                     | Source/Reference                                      |
|-----------------------------------|-------------------------------------------------------------------------------------------------------------------------------------------------------------------------------------|-------------------------------------------------------|
| <b>Strains</b>                    |                                                                                                                                                                                     |                                                       |
| <i>E.coli</i> DH5 $\alpha$        | <i>F- eNDA1 glnV44 thi-1 recA1 relA1 gyrA96 deoRnupG <math>\Phi</math>80dlacZ<math>\Delta</math>M15 <math>\Delta</math>(lacZYA-argF)U169, hsdR17 (rK-mK), <math>\lambda</math>-</i> | Takara Biotechnology Co.,Ltd.                         |
| <i>S.pombe</i> FY7652             | <i>h- leu1-32 ura4-D18</i>                                                                                                                                                          | National Bio Resource Project                         |
| <b>Plasmids</b>                   |                                                                                                                                                                                     |                                                       |
| FnCpf1-OsU6                       | <i>E.coli</i> , <i>pBR322 ori</i> , Kan <sup>r</sup> , FnCpf1, crRNA cassette for expression in rice                                                                                | Gift from Dr. Jiankang Zhu's Lab <sup>1</sup>         |
| LbCpf1-OsU6                       | <i>E.coli</i> , <i>pBR322 ori</i> , Kan <sup>r</sup> , LbCpf1, crRNA cassette for expression in rice                                                                                | Gift from Dr. Jiankang Zhu's Lab <sup>1</sup>         |
| pDUAL-HFF1                        | <i>E.coli</i> - <i>S.pombe</i> shutting vector, <i>ars1 ori</i> , <i>Cole1 ori</i> , <i>fl ori</i> Amp <sup>r</sup> , <i>ura4</i>                                                   | RIKEN BRC (RDB:6179)                                  |
| pDUAL-HFF1-FnCpf1                 | FY7652, FnCpf1/ <i>nmt1</i>                                                                                                                                                         | This study                                            |
| pDUAL-HFF1-LbCpf1                 | FY7652, LbCpf1/ <i>nmt1</i>                                                                                                                                                         | This study                                            |
| pDUAL-HFF1-Cas13a                 | FY7652, LshCas13a/ <i>nmt1</i>                                                                                                                                                      | Our Lab <sup>2</sup>                                  |
| pHL414                            | <i>S. pombe</i> , Tf1 retrotransposon/ <i>nmt1</i>                                                                                                                                  | Gift from Professor Henry L. Levin's lab <sup>3</sup> |
| pBluescript II KS(+)              | <i>E.coli</i> , <i>Cole1 ori</i> , <i>fl ori</i> , Amp <sup>r</sup>                                                                                                                 |                                                       |
| pKS-rrk1-FnCpf1-crRNA-backbone    | <i>E.coli</i> , crRNA backbone plasmid for FnCpf1, Amp <sup>r</sup>                                                                                                                 | This study                                            |
| pKS-rrk1-LbCpf1-crRNA-backbone    | <i>E.coli</i> , crRNA backbone plasmid for LbCpf1, Amp <sup>r</sup>                                                                                                                 | This study                                            |
| pKS-rrk1-LshCas13a-crRNA-backbone | <i>E.coli</i> , crRNA backbone plasmid for LshCas13a, Amp <sup>r</sup>                                                                                                              | This study                                            |

**Supplementary Table S2. Intermediate plasmids for crRNA constructs.**

| Intermediate plasmids                 | Primers                                    | Cloning sites | Original plasmids                 | Source     |
|---------------------------------------|--------------------------------------------|---------------|-----------------------------------|------------|
| pKS-rrk1-(FnCpf1 crMEL1)-NT1          | crMEL1-NT1-P5<br>crMEL1-NT1-P3             | <i>BspQI</i>  | pKS-rrk1-FnCpf1-crRNA-backbone    | This study |
| pKS-rrk1-(FnCpf1 crMEL1)-NT2          | crMEL1-NT2-P5<br>crMEL1-NT2-P3             | <i>BspQI</i>  | pKS-rrk1-FnCpf1-crRNA-backbone    | This study |
| pKS-rrk1-(FnCpf1 crMEL1)-T3           | crMEL1-T3-P5<br>crMEL1-T3-P3               | <i>BspQI</i>  | pKS-rrk1-FnCpf1-crRNA-backbone    | This study |
| pKS-rrk1-(FnCpf1 crMEL1)-T4           | crMEL1-T4-P5<br>crMEL1-T4-P3               | <i>BspQI</i>  | pKS-rrk1-FnCpf1-crRNA-backbone    | This study |
| pKS-rrk1-(FnCpf1 crMEL1)-T5           | crMEL1-T5-P5<br>crMEL1-T5-P3               | <i>BspQI</i>  | pKS-rrk1-FnCpf1-crRNA-backbone    | This study |
| pKS-rrk1-(FnCpf1 crMEL1)-control      | crMEL1-Control-P5<br>crMEL1-Control-P3     | <i>BspQI</i>  | pKS-rrk1-FnCpf1-crRNA-backbone    | This study |
| pKS-rrk1-(LbCpf1 crMEL1)-NT1          | crMEL1-NT1-P5<br>crMEL1-NT1-P3             | <i>BspQI</i>  | pKS-rrk1-LbCpf1-crRNA-backbone    | This study |
| pKS-rrk1-(LbCpf1 crMEL1)-NT2          | crMEL1-NT2-P5<br>crMEL1-NT2-P3             | <i>BspQI</i>  | pKS-rrk1-LbCpf1-crRNA-backbone    | This study |
| pKS-rrk1-(LbCpf1 crMEL1)-T3           | crMEL1-T3-P5<br>crMEL1-T3-P3               | <i>BspQI</i>  | pKS-rrk1-LbCpf1-crRNA-backbone    | This study |
| pKS-rrk1-(LbCpf1 crMEL1)-T4           | crMEL1-T4-P5<br>crMEL1-T4-P3               | <i>BspQI</i>  | pKS-rrk1-LbCpf1-crRNA-backbone    | This study |
| pKS-rrk1-(LbCpf1 crMEL1)-T5           | crMEL1-T5-P5<br>crMEL1-T5-P3               | <i>BspQI</i>  | pKS-rrk1-LbCpf1-crRNA-backbone    | This study |
| pKS-rrk1-(LbCpf1 crMEL1)-control      | crMEL1-Control-P5<br>crMEL1-Control-P3     | <i>BspQI</i>  | pKS-rrk1-LbCpf1-crRNA-backbone    | This study |
| pKS-rrk1-(FnCpf1 crNEO346)            | crNEO346-P5<br>crNEO346-P3                 | <i>BspQI</i>  | pKS-rrk1-FnCpf1-crRNA-backbone    | This study |
| pKS-rrk1-(FnCpf1 crNEO299)            | crNEO299-P5<br>crNEO299-P3                 | <i>BspQI</i>  | pKS-rrk1-FnCpf1-crRNA-backbone    | This study |
| pKS-rrk1-(FnCpf1 crNEO203)            | crNEO203-P5<br>crNEO203-P3                 | <i>BspQI</i>  | pKS-rrk1-FnCpf1-crRNA-backbone    | This study |
| pKS-rrk1-(FnCpf1 crNEO154-1)          | crNEO154-1-P5<br>crNEO154-1-P3             | <i>BspQI</i>  | pKS-rrk1-FnCpf1-crRNA-backbone    | This study |
| pKS-rrk1-(FnCpf1 crNEO154-2)          | crNEO154-2-P5<br>crNEO154-2-P3             | <i>BspQI</i>  | pKS-rrk1-FnCpf1-crRNA-backbone    | This study |
| pKS-rrk1-(FnCpf1 crNEO-Control)       | crNEO-Control-P5<br>crNEO-Control-P3       | <i>BspQI</i>  | pKS-rrk1-FnCpf1-crRNA-backbone    | This study |
| pKS-rrk1-(LshCas13a crRNA)-(Tf1-835)  | Tf1-835-gRNA-P5<br>Tf1-835-gRNA-P3         | <i>BspQI</i>  | pKS-rrk1-LshCas13a-crRNA-backbone | This study |
| pKS-rrk1-(LshCas13a crRNA)-(Tf1-1165) | Tf1-1165-gRNA-P5<br>Tf1-1165-gRNA-P3       | <i>BspQI</i>  | pKS-rrk1-LshCas13a-crRNA-backbone | This study |
| pKS-rrk1-(LshCas13a crRNA)-Control    | Tf1-Control-gRNA-P5<br>Tf1-Control-gRNA-P3 | <i>BspQI</i>  | pKS-rrk1-LshCas13a-crRNA-backbone | This study |

**Supplementary Table S3.** crRNA Constructs for targeting the endogenous *MEL1* gene by FnCpf1 and LbCpf1.

| Plasmid Name                       | Genes/Promoters                                   | crRNA primers                          | Original plasmid  | Descriptions                                                       | Source     |
|------------------------------------|---------------------------------------------------|----------------------------------------|-------------------|--------------------------------------------------------------------|------------|
| pDUAL-HFF1-(FnCpf1 crMEL1)-NT1     | crRNA/ <i>rrk1</i>                                | crMEL1-NT1-P5<br>crMEL1-NT1-P3         | pDUAL-HFF1        | for chromosomal expression of FnCpf1 and episomal expression crRNA | This study |
| pDUAL-HFF1-(FnCpf1 crMEL1)-NT2     | crRNA/ <i>rrk1</i>                                | crMEL1-NT2-P5<br>crMEL1-NT2-P3         | pDUAL-HFF1        | for chromosomal expression of FnCpf1 and episomal expression crRNA | This study |
| pDUAL-HFF1-(FnCpf1 crMEL1)-T3      | crRNA/ <i>rrk1</i>                                | crMEL1-T3-P5<br>crMEL1-T3-P3           | pDUAL-HFF1        | for chromosomal expression of FnCpf1 and episomal expression crRNA | This study |
| pDUAL-HFF1-(FnCpf1 crMEL1)-T4      | crRNA/ <i>rrk1</i>                                | crMEL1-T4-P5<br>crMEL1-T4-P3           | pDUAL-HFF1        | for chromosomal expression of FnCpf1 and episomal expression crRNA | This study |
| pDUAL-HFF1-(FnCpf1 crMEL1)-T5      | crRNA/ <i>rrk1</i>                                | crMEL1-T5-P5<br>crMEL1-T5-P3           | pDUAL-HFF1        | for chromosomal expression of FnCpf1 and episomal expression crRNA | This study |
| pDUAL-HFF1-(FnCpf1 crMEL1)-control | crRNA/ <i>rrk1</i>                                | crMEL1-Control-P5<br>crMEL1-Control-P3 | pDUAL-HFF1        | for chromosomal expression of FnCpf1 and episomal expression crRNA | This study |
| pDUAL-HFF1-(LbCpf1 crMEL1)-NT1     | crRNA/ <i>rrk1</i>                                | crMEL1-NT1-P5<br>crMEL1-NT1-P3         | pDUAL-HFF1        | for chromosomal expression of LbCpf1 and episomal expression crRNA | This study |
| pDUAL-HFF1-(LbCpf1 crMEL1)-NT2     | crRNA/ <i>rrk1</i>                                | crMEL1-NT2-P5<br>crMEL1-NT2-P3         | pDUAL-HFF1        | for chromosomal expression of LbCpf1 and episomal expression crRNA | This study |
| pDUAL-HFF1-(LbCpf1 crMEL1)-T3      | crRNA/ <i>rrk1</i>                                | crMEL1-T3-P5<br>crMEL1-T3-P3           | pDUAL-HFF1        | for chromosomal expression of LbCpf1 and episomal expression crRNA | This study |
| pDUAL-HFF1-(LbCpf1 crMEL1)-T4      | crRNA/ <i>rrk1</i>                                | crMEL1-T4-P5<br>crMEL1-T4-P3           | pDUAL-HFF1        | for chromosomal expression of LbCpf1 and episomal expression crRNA | This study |
| pDUAL-HFF1-(LbCpf1 crMEL1)-T5      | crRNA/ <i>rrk1</i>                                | crMEL1-T5-P5<br>crMEL1-T5-P3           | pDUAL-HFF1        | for chromosomal expression of LbCpf1 and episomal expression crRNA | This study |
| pDUAL-HFF1-(LbCpf1 crMEL1)-control | crRNA/ <i>rrk1</i>                                | crMEL1-Control-P5<br>crMEL1-Control-P3 | pDUAL-HFF1        | for chromosomal expression of LbCpf1 and episomal expression crRNA | This study |
| pDUAL-HFF1-FnCpf1-crMEL1-NT1       | <i>FnCpf1</i> / <i>nmt1</i><br>crRNA/ <i>rrk1</i> | crMEL1-NT1-P5<br>crMEL1-NT1-P3         | pDUAL-FnCpf1-HFF1 | for episomal expression of FnCpf1 and crRNA                        | This study |
| pDUAL-HFF1-FnCpf1-crMEL1-NT2       | <i>FnCpf1</i> / <i>nmt1</i><br>crRNA/ <i>rrk1</i> | crMEL1-NT2-P5<br>crMEL1-NT2-P3         | pDUAL-FnCpf1-HFF1 | for episomal expression of FnCpf1 and crRNA                        | This study |
| pDUAL-HFF1-FnCpf1-crMEL1-T3        | <i>FnCpf1</i> / <i>nmt1</i><br>crRNA/ <i>rrk1</i> | crMEL1-T3-P5<br>crMEL1-T3-P3           | pDUAL-FnCpf1-HFF1 | for episomal expression of FnCpf1 and crRNA                        | This study |
| pDUAL-HFF1-FnCpf1-crMEL1-T4        | <i>FnCpf1</i> / <i>nmt1</i><br>crRNA/ <i>rrk1</i> | crMEL1-T4-P5<br>crMEL1-T4-P3           | pDUAL-FnCpf1-HFF1 | for episomal expression of FnCpf1 and crRNA                        | This study |
| pDUAL-HFF1-FnCpf1-crMEL1-T5        | <i>FnCpf1</i> / <i>nmt1</i><br>crRNA/ <i>rrk1</i> | crMEL1-T5-P5<br>crMEL1-T5-P3           | pDUAL-FnCpf1-HFF1 | for episomal expression of FnCpf1 and crRNA                        | This study |
| pDUAL-HFF1-FnCpf1-crMEL1-control   | <i>FnCpf1</i> / <i>nmt1</i><br>crRNA/ <i>rrk1</i> | crMEL1-Control-P5<br>crMEL1-Control-P3 | pDUAL-FnCpf1-HFF1 | for episomal expression of FnCpf1 and crRNA                        | This study |

**Supplementary Table S4.** crRNA constructs for targeting the Tf1 DNA intermediates (generated via splicing of artificial introns and reverse-transcription) by FnCpf1.

| Plasmid Name                                    | Promoter                                   | Original plasmid         | Descriptions                                                                                        | Source     |
|-------------------------------------------------|--------------------------------------------|--------------------------|-----------------------------------------------------------------------------------------------------|------------|
| pHL414-Tf1-neo-intron346                        | Tf1/ <i>nmt1</i>                           | pHL414                   | Tf1 retrotransposition reporters plasmid, artificial intron is 346bp from ATG of the NEO gene       | This study |
| pHL414-Tf1-neo-intron299                        | Tf1/ <i>nmt1</i>                           | pHL414                   | Tf1 retrotransposition reporters plasmid, artificial intron is 299bp from ATG of the NEO gene       | This study |
| pHL414-Tf1-neo-intron203                        | Tf1/ <i>nmt1</i>                           | pHL414                   | Tf1 retrotransposition reporters plasmid, artificial intron is 203bp from ATG of the NEO gene       | This study |
| pHL414-Tf1-neo-intron154                        | Tf1/ <i>nmt1</i>                           | pHL414                   | Tf1 retrotransposition reporters plasmid, artificial intron is 154bp from ATG of the NEO gene       | This study |
| pHL414-Tf1-neo-intron346-(FnCpf1 crNEO346)      | Tf1/ <i>nmt1</i><br>crRNA/ <i>rrk1</i>     | pHL414-Tf1-neo-intron346 | for chromosomal expression of FnCpf1, episomal expression crRNA and Tf1 retrotransposition reporter | This study |
| pHL414-Tf1-neo-intron299-(FnCpf1 crNEO299)      | Tf1/ <i>nmt1</i><br>crRNA/ <i>rrk1</i>     | pHL414-Tf1-neo-intron299 | for chromosomal expression of FnCpf1, episomal expression crRNA and Tf1 retrotransposition reporter | This study |
| pHL414-Tf1-neo-intron203-(FnCpf1 crNEO203)      | Tf1/ <i>nmt1</i><br>crRNA/ <i>rrk1</i>     | pHL414-Tf1-neo-intron203 | for chromosomal expression of FnCpf1, episomal expression crRNA and Tf1 retrotransposition reporter | This study |
| pHL414-Tf1-neo-intron154-(FnCpf1 crNEO154-1)    | Tf1/ <i>nmt1</i><br>crRNA/ <i>rrk1</i>     | pHL414-Tf1-neo-intron154 | for chromosomal expression of FnCpf1, episomal expression crRNA and Tf1 retrotransposition reporter | This study |
| pHL414-Tf1-neo-intron154-(FnCpf1 crNEO154-2)    | Tf1/ <i>nmt1</i><br>crRNA/ <i>rrk1</i>     | pHL414-Tf1-neo-intron154 | for chromosomal expression of FnCpf1, episomal expression crRNA and Tf1 retrotransposition reporter | This study |
| pHL414-Tf1-neo-intron346-(FnCpf1 crNEO-Control) | Tf1/ <i>nmt1</i><br>crRNA/ <i>rrk1</i>     | pHL414-Tf1-neo-intron346 | for chromosomal expression of FnCpf1, episomal expression crRNA and Tf1 retrotransposition reporter | This study |
| pHL414-Tf1-neo-intron299-(FnCpf1 crNEO-Control) | Tf1/ <i>nmt1</i><br>crRNA/ <i>rrk1</i>     | pHL414-Tf1-neo-intron299 | for chromosomal expression of FnCpf1, episomal expression crRNA and Tf1 retrotransposition reporter | This study |
| pHL414-Tf1-neo-intron203-(FnCpf1 crNEO-Control) | Tf1/ <i>nmt1</i><br>crRNA/ <i>rrk1</i>     | pHL414-Tf1-neo-intron203 | for chromosomal expression of FnCpf1, episomal expression crRNA and Tf1 retrotransposition reporter | This study |
| pHL414-Tf1-neo-intron154-(FnCpf1 crNEO-Control) | Tf1/ <i>nmt1</i><br>crRNA/ <i>rrk1</i>     | pHL414-Tf1-neo-intron154 | for chromosomal expression of FnCpf1, episomal expression crRNA and Tf1 retrotransposition reporter | This study |
| pDUAL-HFF1-FnCpf1-crNEO346                      | FnCpf1 / <i>nmt1</i><br>crRNA/ <i>rrk1</i> | pDUAL-FnCpf1-HFF1        | for chromosomal expression of FnCpf1 and crRNA; episomal expression Tf1 retrotransposition reporter | This study |
| pDUAL-HFF1-FnCpf1-crNEO299                      | FnCpf1 / <i>nmt1</i><br>crRNA/ <i>rrk1</i> | pDUAL-FnCpf1-HFF1        | for chromosomal expression of FnCpf1 and crRNA; episomal expression Tf1 retrotransposition reporter | This study |
| pDUAL-HFF1-FnCpf1-crNEO203                      | FnCpf1 / <i>nmt1</i><br>crRNA/ <i>rrk1</i> | pDUAL-FnCpf1-HFF1        | for chromosomal expression of FnCpf1 and crRNA; episomal expression Tf1 retrotransposition reporter | This study |
| pDUAL-HFF1-FnCpf1-crNEO154-1                    | FnCpf1 / <i>nmt1</i><br>crRNA/ <i>rrk1</i> | pDUAL-FnCpf1-HFF1        | for chromosomal expression of FnCpf1 and crRNA; episomal expression Tf1 retrotransposition reporter | This study |
| pDUAL-HFF1-FnCpf1-crNEO154-2                    | FnCpf1 / <i>nmt1</i><br>crRNA/ <i>rrk1</i> | pDUAL-FnCpf1-HFF1        | for chromosomal expression of FnCpf1 and crRNA; episomal expression Tf1 retrotransposition reporter | This study |
| pDUAL-HFF1-FnCpf1-crNEO-control                 | FnCpf1 / <i>nmt1</i><br>crRNA/ <i>rrk1</i> | pDUAL-FnCpf1-HFF1        | for chromosomal expression of FnCpf1 and crRNA; episomal expression Tf1 retrotransposition reporter | This study |



**Supplementary Table S5.** crRNA constructs for targeting the Tf1 RNA intermediates by LshCas13a.

| Plasmid Name                            | Promoter                               | Original plasmid | target sequence (5' to 3')       | Descriptions                                                                  | Source     |
|-----------------------------------------|----------------------------------------|------------------|----------------------------------|-------------------------------------------------------------------------------|------------|
| pHL414-Tf1-(LshCas13a crRNA)-(Tf1-835)  | Tf1/ <i>nmt1</i><br>crRNA/ <i>rrk1</i> | pHL414           | ATCCAAC TAGGTTTAC<br>CATCTTCTTAA | for chromosomal expression of LshCas13a and episomal expression crRNA and Tf1 | This study |
| pHL414-Tf1-(LshCas13a crRNA)-(Tf1-1165) | Tf1/ <i>nmt1</i><br>crRNA/ <i>rrk1</i> | pHL414           | TGTCGTTCTCCTTTAAA<br>AACTTATTGTT | for chromosomal expression of LshCas13a and episomal expression crRNA and Tf1 | This study |
| pHL414-Tf1-(LshCas13a crRNA)-Control    | Tf1/ <i>nmt1</i><br>crRNA/ <i>rrk1</i> | pHL414           | AATGCCTGGCTTGTCG<br>ACGCATAGTCTG | for chromosomal expression of LshCas13a and episomal expression crRNA and Tf1 | This study |

## References

- 1 Wang, M., Mao, Y., Lu, Y., Tao, X. & Zhu, J. K. Multiplex gene editing in rice using the CRISPR-Cpf1 system. *Mol. Plant* **10**, 1011-1013 (2017).
- 2 Jing, X. *et al.* Implementation of the CRISPR-Cas13a system in fission yeast and its repurposing for precise RNA editing. *Nucleic Acids Res.* **46**, 90 (2018).
- 3 Sangesland, M., Atwood-Moore, A., Rai, S. K. & Levin, H. L. Qualitative and quantitative assays of transposition and homologous recombination of the retrotransposon Tf1 in *Schizosaccharomyces pombe*. *Methods Mol. Biol.* **1400**, 117-130 (2016).

## Supplementary Data S1

| Primers Name                                                                                | Sequences (5'-3')                                                                                                                                                                                                                                                 | Purpose                                                  |
|---------------------------------------------------------------------------------------------|-------------------------------------------------------------------------------------------------------------------------------------------------------------------------------------------------------------------------------------------------------------------|----------------------------------------------------------|
| <b>Construction of vectors and <i>S. pombe</i> strains for FnCpf1 and LbCpf1 expression</b> |                                                                                                                                                                                                                                                                   |                                                          |
| pHSN-Fn-NdeI-F                                                                              | GCATCACCACCATCAT CATATG gactataaggaccacg                                                                                                                                                                                                                          | Amplification of FnCpf1 and LbCpf1                       |
| pHSN-Fn-NcoI-R                                                                              | CATCGTCGTCCTTGTAGT CCATGG ttacttttctttttgctg                                                                                                                                                                                                                      | Amplification of FnCpf1 and LbCpf1                       |
| ADHterm-F                                                                                   | CTCTTATTGACCACACCTCTACC                                                                                                                                                                                                                                           | Confirmation of correct integration<br>FnCpf1 and LbCpf1 |
| leu1-R                                                                                      | GGTCATAAAGTTGAACGGATGTCG                                                                                                                                                                                                                                          | Confirmation of correct integration<br>FnCpf1 and LbCpf1 |
| <b>Construction of Tf1 retrotransposition reporters with artificial introns</b>             |                                                                                                                                                                                                                                                                   |                                                          |
| neo-intron299                                                                               | gaatgctgtttcccggggatcgGTAGGTGCTATTTTACTAGTCTAAGCTAA<br>TCAATAGcagtggtagtaacctgcatcatcaggagtacggataaaatgcttgatggtcggaa<br>gaggcataaattccgtcagccagtttagtctgacctctcatctgtaacatcattggcaacgctaccttg<br>ccatgttcagaaacaactctggcgcacatcgggcttccataacaatgatagattgtcgcacct | To generate the NEO fragments<br>with artificial intron  |
| neo-intron203                                                                               | gaatgctgtttcccggggatcgagtagtaacctgcatcatcaggagtacggataaaatgctt<br>gatggtcggagaggcataaattccgtcagccagtttagtctgacctctGTAGGTGCTATT<br>TACTAGTCTAAGCTAATCAATAGcatctgtaacatcattggcaacgctaccttg<br>ccatgttcagaaacaactctggcgcacatcgggcttccataacaatgatagattgtcgcacct       | To generate the NEO fragments<br>with artificial intron  |
| neo-intron154                                                                               | gaatgctgtttcccggggatcgagtagtaacctgcatcatcaggagtacggataaaatgctt<br>gatggtcggagaggcataaattccgtcagccagtttagtctgacctctcatctgtaacatcattggca<br>acgctaccttgccatgttcagaaacaGTAGGTGCTATTTTACTAGTCTAAG<br>CTAATCAATAGctctggcgcacatcgggcttccataacaatgatagattgtcgcacct       | To generate the NEO fragments<br>with artificial intron  |
| neo-intron346-P5                                                                            | tcaacaatatttcacctgaGTAGGTGCTATTTTACTAGTCTAAGCTAATC<br>AATAGatcaggatattcttctaatac                                                                                                                                                                                  | To generate the NEO fragments<br>with artificial intron  |

|                  |                                                                                  |                                                         |
|------------------|----------------------------------------------------------------------------------|---------------------------------------------------------|
| neo-intron346-P3 | gtattagaagaatatcctgatCTATTGATTAGCTTAGACTAGTAAAATAGC<br>ACCTACtcaggtgaaaatattgtga | To generate the NEO fragments<br>with artificial intron |
| Neo-TYCZ-P5      | catcaacaatattttcacctgaatcaggatattcttctaataacctggaatgctgtttcccggggat              | To generate the NEO fragments<br>with artificial intron |
| Neo-TYCZ-P3      | atgggtataaatgggctcgcgataatgtcgggcaatcaggtgcgacaatctatcgattg                      | To generate the NEO fragments<br>with artificial intron |

### Intermediate plasmids for crRNA constructs

|                   |                                |                                                                |
|-------------------|--------------------------------|----------------------------------------------------------------|
| crMEL1-NT1-P5     | gat CAGATTGGGGAGTAGATTACTTAAA  | the oligonucleotide pairs designed for spacer<br>of each crRNA |
| crMEL1-NT1-P3     | gcc TTAAAGTAATCTACTCCCAATCTG   |                                                                |
| crMEL1-NT2-P5     | gat CAATAATGATTGGGTAGTGGCTGTT  | the oligonucleotide pairs designed for spacer<br>of each crRNA |
| crMEL1-NT2-P3     | gcc AACAGCCACTACCCAATCATTATTG  |                                                                |
| crMEL1-T3-P5      | gat GTCCCAAACCATTATAGCTACCATG  | the oligonucleotide pairs designed for spacer<br>of each crRNA |
| crMEL1-T3-P3      | gcc CATGGTAGCTATAATGGTTTGGGAC  |                                                                |
| crMEL1-T4-P5      | gat CTTCCAATCTACCAGTGGTTGCATT  | the oligonucleotide pairs designed for spacer<br>of each crRNA |
| crMEL1-T4-P3      | gcc AATGCAACCACTGGTAGATTGGAAG  |                                                                |
| crMEL1-T5-P5      | gat AGTAATCTACTCCCAATCTGCAAA   | the oligonucleotide pairs designed for spacer<br>of each crRNA |
| crMEL1-T5-P3      | gcc TTTGCAGATTGGGGAGTAGATTACT  |                                                                |
| crMEL1-Control-P5 | gat AACAGCGCCTTAAAAGAACTAGAAA  | the oligonucleotide pairs designed for spacer<br>of each crRNA |
| crMEL1-Control-P3 | gcc TTTCTAGTTCTTTTAAGGCGCTGTT  |                                                                |
| crNEO346-P5       | GAT acctgaatcaggatattcttcta    | the oligonucleotide pairs designed for spacer<br>of each crRNA |
| crNEO346-P3       | GCC attagaagaatatcctgattcaggt  |                                                                |
| crNEO299-P5       | GAT ccggggatcgcagtggtgagtaacc  | the oligonucleotide pairs designed for spacer<br>of each crRNA |
| crNEO299-P3       | GCC ggttactcaccactcgcgatccccgg |                                                                |
| crNEO203-P5       | GAT gtctgacctctcatctgtaacatc   | the oligonucleotide pairs designed for spacer<br>of each crRNA |
| crNEO203-P3       | GCC gatgttacagatgagatggtcagac  |                                                                |

|                     |                                  |                                                  |
|---------------------|----------------------------------|--------------------------------------------------|
| crNEO154-1-P5       | GAT ccatgtttcagaaacaactctggcg    | the oligonucleotide pairs designed for spacer    |
| crNEO154-1-P3       | GCC cgccagagttgtttctgaaacatgg    | of each crRNA                                    |
| crNEO154-2-P5       | GAT agaaacaactctggcgcatcgggct    | the oligonucleotide pairs designed for spacer    |
| crNEO154-2-P3       | GCC agcccgatgcgccagagttgtttct    | of each crRNA                                    |
| crNEO-Control-P5    | gat AACAGCGCCTTAAAAGAACTAGAAA    | the oligonucleotide pairs designed for spacer    |
| crNEO-Control-P3    | gcc TTTCTAGTTCTTTTAAGGCGCTGTT    | of each crRNA                                    |
| Tf1-835-gRNA-P5     | aac Atccaactagtttaccattcttcttaa  | the oligonucleotide pairs designed for spacer of |
| Tf1-835-gRNA-P3     | gcc ttaagaagaatggtaaacctagtggat  | each crRNA                                       |
| Tf1-1165-gRNA-P5    | aac Tgtcgttctccttataaaacttattgtt | the oligonucleotide pairs designed for spacer    |
| Tf1-1165-gRNA-P3    | gcc aacaataagttttaaaggagaacgaca  | of each crRNA                                    |
| Tf1-Control-gRNA-P5 | acc CAGACTATGCGTCGACAAGCCAGGCATT | the oligonucleotide pairs designed for spacer    |
| Tf1-Control-gRNA-P3 | gcc AATGCCTGGCTTGTCGACGCATAGTCTG | of each crRNA                                    |

### **Construction of crRNA vectors to direct targeting by FnCpf1, LbCpf1, and LshCas13a**

|                |                                                     |                                                                                                              |
|----------------|-----------------------------------------------------|--------------------------------------------------------------------------------------------------------------|
| pDUAL-PspXI-T7 | CCTCCAATCTTGTGTTCTTCAA TAATACGACTCACTATAGG          | Amplification of crRNA array cassettes inserted into linearized plasmids pDUAL-HFF1                          |
| pDUAL-SpeI-T3  | CGCTAGGGATAACAGGGTAATAT<br>AATTAACCCTCACTAAAGG      | Amplification of crRNA array cassettes inserted into linearized plasmids pDUAL-HFF1                          |
| pHL414-NheI-T7 | TGCAGCCCGGGGATCCCAGCTGTAATACGACTCACTATAG            | Amplification of crRNA array cassettes inserted into linearized plasmids of Tf1 retrotransposition reporters |
| pHL414-NheI-T3 | ATCGCCAGTCACTATGGCGTGCTtctagaAATTAACCCTCACTAA<br>AG | Amplification of crRNA array cassettes inserted into linearized plasmids of Tf1 retrotransposition reporters |

|                             |                                                     |                                                                                           |
|-----------------------------|-----------------------------------------------------|-------------------------------------------------------------------------------------------|
| pDUAL-SpeI-SK primer        | ATCGACGATAAAAGAATCATCTTtctagaactagtgatc             | Amplification of crRNA array cassettes inserted into linearized plasmid pDUAL-HFF1-FnCpf1 |
| pDUAL-SpeI-T3               | CGCTAGGGATAACAGGGTAATATAATTAACCCTCACTAAAGG          | Amplification of crRNA array cassettes inserted into linearized plasmid pDUAL-HFF1-FnCpf1 |
| NheI-TYB-P5                 | GGGGGATCCCAGCTGGCTAGCAATTAACCCTCACTAAAGG            | Amplification of crRNA array cassettes inserted into linearized plasmid pHL414            |
| NheI-TYB-P3                 | TCACTATGGCGTGCTGCTAGCTAATACGACTCACTATAGG            | Amplification of crRNA array cassettes inserted into linearized plasmid pHL414            |
| <b>MEL1-repair fragment</b> |                                                     |                                                                                           |
| mel1-left-P5-new            | AGGTAAAACCTCCAGAACATTAC                             | Amplification of repair fragment for <i>MEL1</i> deletion                                 |
| mel1-left-P3-new            | TCATGTGCTAGGTCGATTCTGG<br>GAACAAGAAGTCAATATCGCTTAC  | Amplification of repair fragment for <i>MEL1</i> deletion                                 |
| mel1-right-P5-new           | GTAAGCGATATTGACTTCTTGTTCC<br>CCAGAATCGACCTAGCACATGA | Amplification of repair fragment for <i>MEL1</i> deletion                                 |
| mel1-right-P3-new           | GCTATAGTAGAACGAGCCCCGA                              | Amplification of repair fragment for <i>MEL1</i> deletion                                 |
| MEL1-P5                     | AGGTAAAACCTCCAGAACATTAC                             | Confirmation <i>MEL1</i> deletion                                                         |
| MEL1-P3                     | GCTATAGTAGAACGAGCCCCGA                              | Confirmation <i>MEL1</i> deletion                                                         |

Supplementary Data S2

**Interference with Tf1 retrotransposition by CRISPR-Cas12a leaving marginal transposition activities**

| crRNA-plasmid        | # of colonies        | YE+Ura.+5-FOA<br>--10 <sup>5</sup> cell / mL | YE+Ura.+5-FOA+G418<br>--10 <sup>6</sup> cell / mL | Transposition<br>frequency(%) | Normalized -<br>Transposition<br>frequency(%) |
|----------------------|----------------------|----------------------------------------------|---------------------------------------------------|-------------------------------|-----------------------------------------------|
| <i>crNEO</i> 346     | crNEO346-①           | 1500                                         | 12                                                | 0.08                          | 0.1                                           |
|                      | crNEO346-②           | 2500                                         | 14                                                | 0.06                          |                                               |
|                      | crNEO346-③           | 2795                                         | 19                                                | 0.07                          |                                               |
|                      | mean (crNEO346)      |                                              |                                                   | 0.07                          |                                               |
| <i>crNEO</i> control | crNEO-control-1-①    | 2000                                         | 74                                                | 0.37                          | 1.0                                           |
|                      | crNEO-control-1-②    | 2000                                         | 86                                                | 0.43                          |                                               |
|                      | crNEO-control-1-③    | 2000                                         | 160                                               | 0.80                          |                                               |
|                      | crNEO-control-2-①    | 2600                                         | 259                                               | 1.00                          |                                               |
|                      | crNEO-control-2-②    | 2200                                         | 228                                               | 1.04                          |                                               |
|                      | crNEO-control-2-③    | 2300                                         | 210                                               | 0.91                          |                                               |
|                      | mean (crNEO-control) |                                              |                                                   | 0.76                          |                                               |

**Prolonged crRNA targeting eliminating residual Tf1 retrotransposition by CRISPR-Cas12a**

| crRNA-strain         | # of colonies        | YE+Ura.+5-FOA<br>--10 <sup>5</sup> cell / mL | YE+Ura.+5-FOA+G418<br>--10 <sup>7</sup> cell / mL | Transposition<br>frequency(%) | Normalized -<br>Transposition<br>frequency(%) |
|----------------------|----------------------|----------------------------------------------|---------------------------------------------------|-------------------------------|-----------------------------------------------|
| <i>crNEO</i> 346     | crNEO 346-①          | 2200                                         | 1                                                 | 0.000                         | 0.00                                          |
|                      | crNEO 346-②          | 2000                                         | 1                                                 | 0.001                         |                                               |
|                      | crNEO 346-③          | 2500                                         | 1                                                 | 0.000                         |                                               |
|                      | mean (crNEO 346)     |                                              |                                                   | 0.000                         |                                               |
| <i>crNEO</i> control | crNEO control-①      | 2500                                         | 1220                                              | 0.488                         | 1.00                                          |
|                      | crNEO control-②      | 2500                                         | 1214                                              | 0.486                         |                                               |
|                      | crNEO control-③      | 2500                                         | 1257                                              | 0.503                         |                                               |
|                      | mean (crNEO control) |                                              |                                                   | 0.492                         |                                               |

**Interfering with Tf1 retrotransposition by CRISPR-Cas13a via targeting its RNA intermediates**

| <b>crRNA-plasmid</b> | <b># of colonies</b> | <b>YE+Ura.+5-FOA+G418<br/>--10<sup>6</sup> cell / mL</b> | <b>YE+Ura.+5-FOA<br/>--10<sup>5</sup> cell / mL</b> | <b>Transposition<br/>frequency(%)</b> | <b>Normalized -<br/>Transposition<br/>frequency(%)</b> |
|----------------------|----------------------|----------------------------------------------------------|-----------------------------------------------------|---------------------------------------|--------------------------------------------------------|
| Tf1-835              | Tf1-835-①            | 820                                                      | 2100                                                | 3.905                                 | 0.84                                                   |
|                      | Tf1-835-②            | 800                                                      | 2000                                                | 4.000                                 |                                                        |
|                      | Tf1-835-③            | 870                                                      | 2000                                                | 4.350                                 |                                                        |
|                      | mean (Tf1-835-1)     |                                                          |                                                     | 4.085                                 |                                                        |
| Tf1-1165             | Tf1-1165-①           | 340                                                      | 1700                                                | 2.000                                 | 0.40                                                   |
|                      | Tf1-1165-②           | 400                                                      | 2150                                                | 1.860                                 |                                                        |
|                      | Tf1-1165-③           | 400                                                      | 2020                                                | 1.980                                 |                                                        |
|                      | mean(Tf1-1165-3)     |                                                          |                                                     | 1.947                                 |                                                        |
| Tf1-control          | Tf1-control-①        | 970                                                      | 1900                                                | 5.105                                 | 1.00                                                   |
|                      | Tf1-control-②        | 1020                                                     | 2000                                                | 5.100                                 |                                                        |
|                      | Tf1-control-③        | 910                                                      | 2100                                                | 4.333                                 |                                                        |
|                      | mean (Tf1-control)   |                                                          |                                                     | 4.846                                 |                                                        |
